# Supplementary material for: The Physiology of Postharvest Tea (Camellia sinensis) Leaves, According to Metabolic Phenotypes and Gene Expression Analysis
Source: MDPI journal article supplement (doi:10.3390/molecules27051708), 2022-03-05
Supplement: s1 [file s1]

**Table S1.** PCR primers used for gene expression analysis.

| Enzyme name                                     | Primer        | Primer sequence (5'-3')    |
|-------------------------------------------------|---------------|----------------------------|
| Farnesene synthase                              | qCsFAS-F      | GAGATAGCCAGGAAGAAG         |
|                                                 | qCsFAS-R      | TGGTAAATAAAATGAGCC         |
| Limonene synthase                               | qCsLMS-F      | GTTGACAGATGGGATGTG         |
|                                                 | qCsLMS-R      | CAATGTTGGCTTGTACCC         |
| Germacrene D synthase                           | qCsGDS-F      | GGTACCGGAGGTCACTCG         |
|                                                 | qCsGDS-R      | TGTCATCATGGTGATCAT         |
| Mevalonate-5-pyrophosphate decarboxylase        | qCsMVD-F      | GGAATCGCTCAGAAGAAT         |
|                                                 | qCsMVD-R      | TTAGGAGGGAAGTGGAAA         |
| 4-Hydroxy-3-methylbutenyl diphosphate reductase | qCsHDR-F      | GGGGTTTGATCCAGACAG         |
|                                                 | qCsHDR-R      | TGAAGTGCTCGTTGAGGT         |
| Terpene synthase 78                             | qCsTPS78-F    | AGGCATTGATTACCACTTCCGGGAG  |
|                                                 | qCsTPS78-R    | GCACATTGTAGCCTTGTTCCTCAA   |
| Terpene synthase 77                             | qCsTPS77-F    | GCAAGAAGGGTACAATGTGCCCCGCG |
|                                                 | qCsTPS77-R    | CTGCGGCTTGATCAAGAATGTCTTC  |
| Tea caffeine synthase1                          | qCsTCS1-F     | TTACTTTTCTGACGAGGCA        |
|                                                 | qCsTCS1-R     | TGCGTTAAGAGCTTGAAGG        |
| Tea caffeine synthase2                          | qCsTCS2-F     | CCATTGCAGTTGGCACCA         |
|                                                 | qCsTCS2-R     | ACAACCCAAGTCCACTGC         |
| Alanine decarboxylase                           | qCsAlaDC-F    | GATTGGTTTGCCCGTCTATG       |
|                                                 | qCsAlaDC-R    | ATTATGGCTGGTTGTCCTT        |
| Theanine synthetase                             | qCsTSI-F      | GTTGATGTTTCTGGGCAGCA       |
|                                                 | qCsTSI-R      | CTCACCCACACCAGTCAGAT       |
| Glutamine synthetase 2                          | qCsGS2-F      | CAGATTTTGGCTCCTTCC         |
|                                                 | qCsGS2-R      | GTGCTGTTTTCGGACTGT         |
| Flavonoid 3',5'-hydroxylase                     | qCsF3'5'-H-F  | AAAGTAATTGGAAGAAACCGCC     |
|                                                 | qCsF3'5'-H-R  | TAGGAATACTGAGGGGAAGTGA     |
| Flavonoid 3-hydroxylase                         | qCsF3H-F      | GACCTACTTCTCATACCCGATC     |
|                                                 | qCsF3H-R      | AGTCCATCAATTTCTCGCTGTA     |
| Leucoanthocyanidin reductase                    | qCsLAR-F      | GTGTTGGAATCTGTGTCCGCAG     |
|                                                 | qCsLAR-R      | CTCCATGAATGCTTGATCCTTG     |
| Anthocyanidin reductase                         | qCsANR-F      | AACCAGCAATTCAAGGAGTAGT     |
|                                                 | qCsANR-R      | TCCCATTGAGCTTATTGATCGA     |
| Serine carboxypeptidase-like acyltransferases 7 | qCsSCPL1A7-F2 | CGCGCCAATATACTATATGTAGAT   |
|                                                 | qCsSCPL1A7-R2 | ATAAGAATCACCACCAATGTATAG   |
| Actin                                           | qCsActin-F    | GCCATATTTGATTGGAATGG       |
|                                                 | qCsActin-R    | GGTGCCACAACCTTGATCTT       |

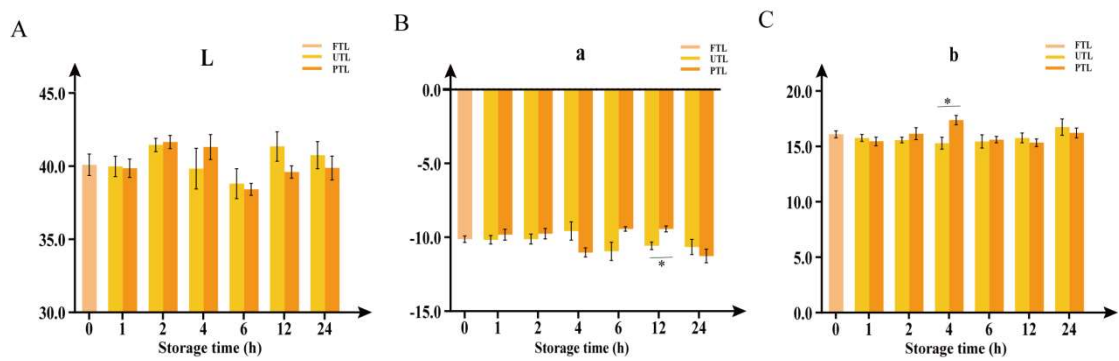

**Figure S1.** Changes in the values of L\* (A), a\* (B), and b\* (C) in tea leaves in UTL and PTL at different time points and FTL at 0 h. Dunnett's multiple comparisons and t test was used to identify significant differences (\*,  $P < 0.05$ ). Values are the mean  $\pm$  SEM of all replicates.

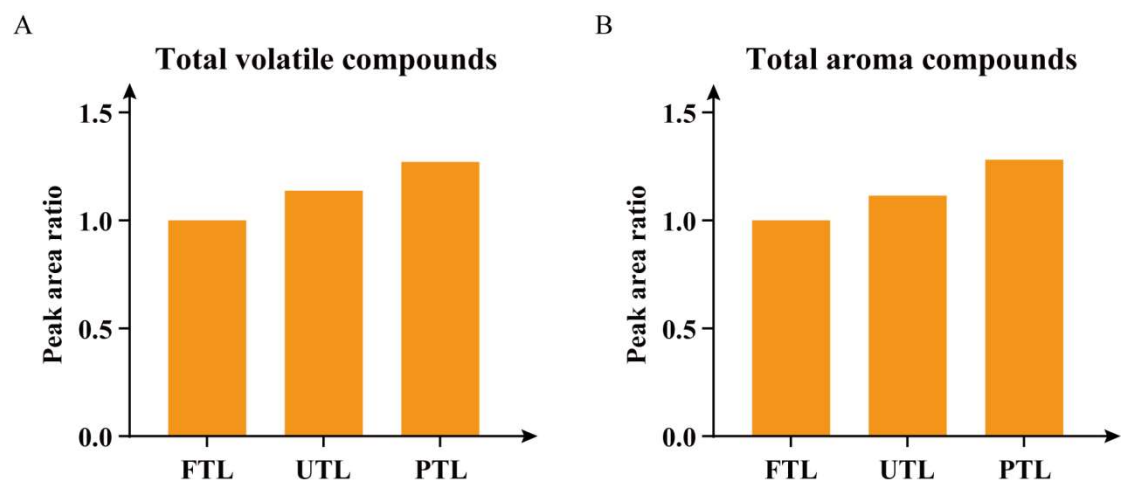

**Figure S2.** Total volatile compounds (A) and aroma compounds (B) contents in FTL, UTL, and PTL at 24 h postharvest.
